# Supplementary material
Source: publisher figshare collection journal article supplement (https://acs.figshare.com/ndownloader/files/5087341)
Supplement: Supplementary file 1 [file 5087341]

## SUPPORTING INFORMATION

**Extinction Coefficients for Oligonucleotides.** Millimolar extinction coefficients for ODNs were calculated according to the Beer-Lambert equation as described (1):

$$E = A (15.3) + G (11.9) + C (7.4) + T (9.3)$$

where  $E$  is the extinction coefficient in mmole/liter, A, G, C, and T are the number of each nucleotide, and the numbers in parentheses are the molar extinction coefficients for DNA mononucleotides.

| <b>ODN</b>     | <b>Sequence (5'→3')</b>                                               | <b>Extinction coefficient</b> |
|----------------|-----------------------------------------------------------------------|-------------------------------|
| <b>I</b>       | CGCGCTCCCGCCCCCTCTCCCCTCCCCGCGC                                       | 259.5                         |
| <b>II</b>      | GCGCGGGGAGGGGAGAGGGGGCGGGAGCGCG                                       | 360                           |
| <b>III</b>     | GGGGAGGGGAGAGGGGGCGGGA                                                | 270.9                         |
| <b>IV</b>      | TCGGGCGCGCGGGGAGGGGAGAGGGGGCGGGAGCGCG                                 | 419.8                         |
| <b>V</b>       | CAGGGGGCGGGCAAGGGCGGAGGCGCGCTCGGGC                                    | 375.1                         |
| <b>VI</b>      | CAGGGGGCGGGCAAGGGCGGAGGCGCGCTCGGGCGCG<br>CGGGGAGGGGAGAGGGGGCGGGAGCGCG | 735.1                         |
| <b>VII</b>     | GCGCGGGGAGGGGAGAGGGGGCGGGGACGCG                                       | 360                           |
| <b>VIII</b>    | GCGCGGCGAGCGGAGAGGGCGCGCGAGCGCG                                       | 342                           |
| <b>IX</b>      | GCGCGGGGAGGGCTCTCCGGGCGGGAGCGCG                                       | 330                           |
| <b>X</b>       | GCGCGGGGAGGGGTCTGGGGGCGGGAGCGCG                                       | 343.5                         |
| <b>XI</b>      | GCGCGGGGAGGGCTCTGGGGGCGGGAGCGCG                                       | 339                           |
| <b>XII</b>     | GCGCGGGGAGGGGTCTCGGGGCGGGAGCGCG                                       | 339                           |
| <b>XIII</b>    | GCGCGGGGAGGGGTCTCCGGGCGGGAGCGCG                                       | 334.5                         |
| <b>XIV</b>     | GCGCGGGGAGGGCTCTCGGGGCGGGAGCGCG                                       | 334.5                         |
| <b>myc1245</b> | TGGGGAGGGTTTTTAGGGTGGGGA                                              | 277.6                         |

### Reference

- (1) Sambrook, J. and Russell, D. W. (2001) *Molecular Cloning, A Laboratory Manual* Cold Spring Harbor Laboratory Press, Cold Spring Harbor, NY.
